# Supplementary material
Source: PubMed Central journal article supplement (PMC4444998)

# Inhibition of Human Prolyl Oligopeptidase Activity by the Cyclotide Psysol 2 Isolated from *Psychotria solitudinum*

Roland Hellinger,<sup>†</sup> Johannes Koebach,<sup>†</sup> Albert Puigpinós,<sup>‡</sup> Richard J. Clark,<sup>‡</sup> Teresa Tarragó,<sup>‡</sup> Ernest Giralt<sup>‡,||</sup> and Christian W. Gruber<sup>†</sup>

<sup>†</sup>Center for Physiology and Pharmacology, Medical University of Vienna, Schwarzschanerstrasse 17, 1090 Vienna, Austria

<sup>‡</sup>Institute for Research in Biomedicine (IRB Barcelona), 08028 Barcelona, Spain

<sup>‡</sup>School of Biomedical Sciences, The University of Queensland, Brisbane, QLD 4072, Australia

<sup>||</sup>Department of Organic Chemistry, University of Barcelona (UB), 08028 Barcelona, Spain

## Supporting Information

**Supplementary Table S1. Concentration-dependent POP inhibitory activity of *Psychotria solitudinum*, *P. capitata*, *P. poeppigiana* and *Viola tricolor* HPLC fractions**

| plant fraction                    | concentration<br>[ $\mu\text{g/mL}$ ] | POP inhibition<br>[%] <sup>a</sup> | plant fraction                 | concentration<br>[ $\mu\text{g/mL}$ ] | POP inhibition<br>[%] <sup>a</sup> |
|-----------------------------------|---------------------------------------|------------------------------------|--------------------------------|---------------------------------------|------------------------------------|
| <i>Psychotria solitudinum</i> -F1 | 400                                   | 59                                 | <i>Psychotria capitata</i> -F1 | 400                                   | 67 $\pm$ 4                         |
|                                   | 200                                   | 40                                 |                                | 200                                   | 46 $\pm$ 2                         |
|                                   | 100                                   | 27                                 |                                | 100                                   | 33 $\pm$ 1                         |
| Psysol-F2                         | 400                                   | 64                                 | Psysol-F2                      | 400                                   | 50 $\pm$ 3                         |
|                                   | 200                                   | 40                                 |                                | 200                                   | 37 $\pm$ 1                         |
|                                   | 100                                   | 30                                 |                                | 100                                   | 17 $\pm$ 3                         |
| Psysol-F3                         | 400                                   | 78                                 | Psysol-F3                      | 400                                   | 55 $\pm$ 5                         |
|                                   | 200                                   | 61                                 |                                | 200                                   | 38 $\pm$ 3                         |
|                                   | 100                                   | 48                                 |                                | 100                                   | 29 $\pm$ 4                         |
| <i>Psychotria poeppigiana</i> -F1 | 400                                   | 61                                 | <i>Viola tricolor</i> -F1      | 400                                   | 75 $\pm$ 2                         |
|                                   | 200                                   | 32 $\pm$ 2                         |                                | 200                                   | 51 $\pm$ 7                         |
|                                   | 100                                   | 24 $\pm$ 1                         |                                | 100                                   | 36 $\pm$ 7                         |
| Pypoe-F2                          | 400                                   | 51 $\pm$ 5                         | Vitri-F2                       | 400                                   | 86 $\pm$ 1                         |
|                                   | 200                                   | 32 $\pm$ 6                         |                                | 200                                   | 72 $\pm$ 1                         |
|                                   | 100                                   | 21 $\pm$ 5                         |                                | 100                                   | 51 $\pm$ 0                         |
| Pypoe-F3                          | 400                                   | 49 $\pm$ 1                         | Vitri-F3                       | 400                                   | 76 $\pm$ 3                         |
|                                   | 200                                   | 29 $\pm$ 3                         |                                | 200                                   | 54 $\pm$ 4                         |
|                                   | 100                                   | 13 $\pm$ 5                         |                                | 100                                   | 37 $\pm$ 2                         |
| Pypoe-F4                          | 400                                   | 83                                 | Vitri-F4                       | 400                                   | 55                                 |
|                                   | 200                                   | 63                                 |                                | 200                                   | 43                                 |
|                                   | 100                                   | 47                                 |                                | 100                                   | 26                                 |

<sup>a</sup>Values are presented as mean (of three replicates) or mean  $\pm$  STDEV (n=2)

**Supplementary Figure S1. Analysis of purified fraction Vitri-F3 from *Viola tricolor*.** A subfraction of Vitri-F3 yielded a mixture of two main cyclotides, namely kalata B1 (2890.85  $m/z$ ) and kalata S (2876.84  $m/z$ ) as indicated by mass traces of a MALDI-TOF-MS spectrum (A). The two cyclotides were found to co-elute as indicated in the A<sub>280</sub> RP-HPLC-UV spectrum (B).

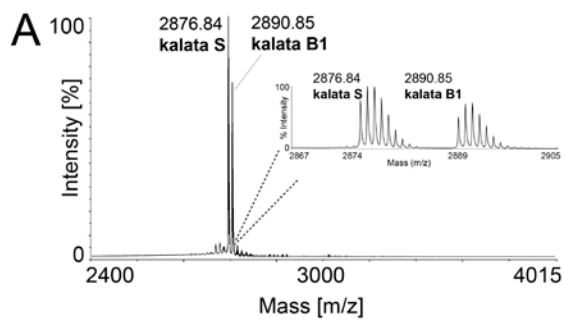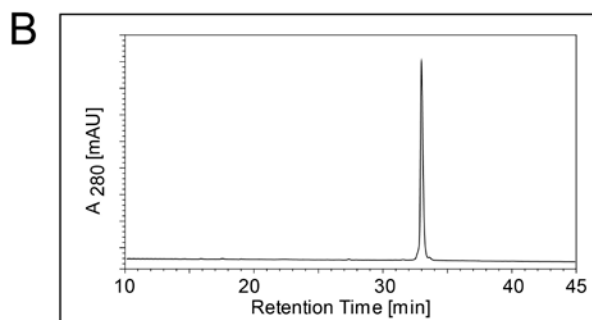

**Supplementary Figure S2. Analytical characterization of synthesized psysol 2 and kalata B1.** The quality of the synthetic cyclotides was characterized by MALDI-TOF MS and RP-HPLC. The molecular weight (monoisotopic,  $[M+H]^+$ ) of synthesized cyclotides kalata B1 (A) and psysol 2 (C) was confirmed to be  $m/z$  2890.9 and  $m/z$  2905.2, respectively. Purity was  $>95\%$  as determined by HPLC-UV for both kalata B1 (B) and psysol 2 (D). Furthermore, co-elution experiments indicated that both synthetic and plant-purified psysol 2 (E) as well as synthetic and purified kalata B1 (F) have identical retention times in RP-HPLC.

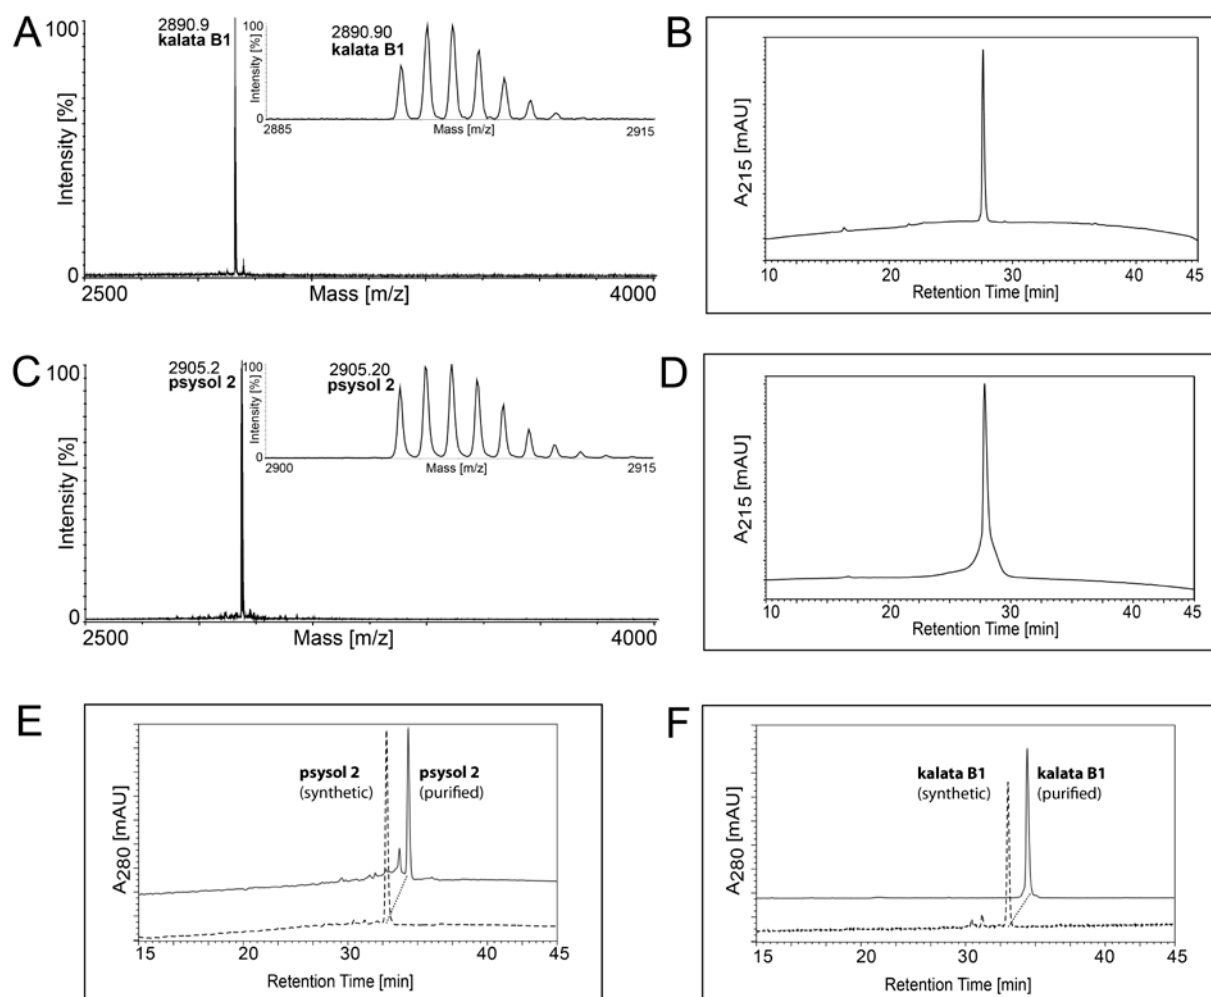

**Supplementary Figure S3. Inhibitor specificity as determined by trypsin and chymotrypsin inhibition assays.** To elucidate the specificity of the human POP inhibitory activity of cyclotides, putative inhibition of two common serine proteases, namely trypsin and chymotrypsin, was evaluated using ppsylol 2 and kalata B1. Protease activity of trypsin was not inhibited by the cyclotides kalata B1 or ppsylol 2 as shown in (A) at the tested concentrations of 25  $\mu$ M and 75  $\mu$ M, respectively. In contrast, the serine protease inhibitor PMSF (positive control) was able to inhibit trypsin activity at 100  $\mu$ M (A). Similarly, kalata B1 and ppsylol 2 had no effect on the activity of chymotrypsin at concentrations of 25  $\mu$ M and 75  $\mu$ M, whereas PMSF inhibitor (100  $\mu$ M) completely blocked chymotrypsin activity (B).

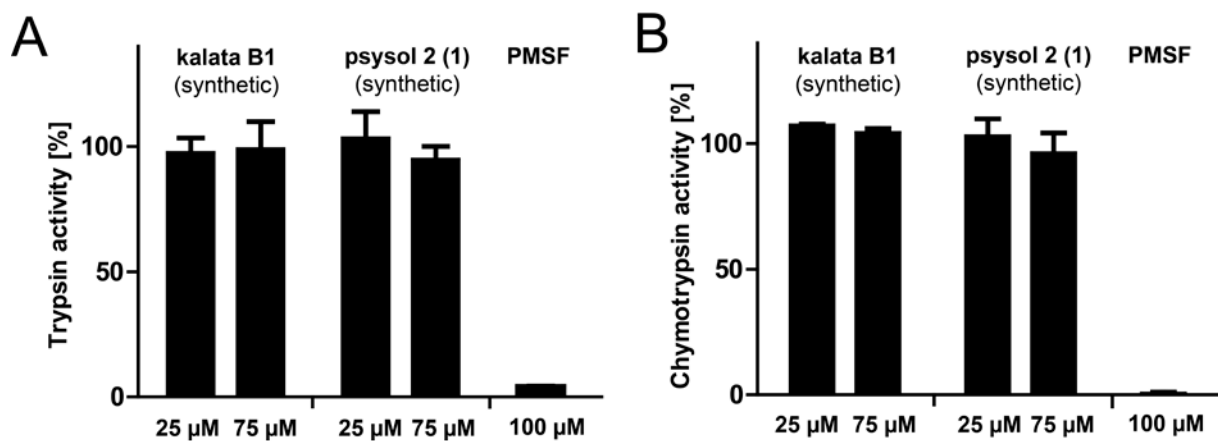

**Supplementary Figure S4. Sequence alignment of cyclotides identified in *Psychotria* species and *Viola tricolor*.** A cyclotide sequence alignment of identified cyclotides present in *Psychotria solitudinum*, *P. capitata*, *P. poeppigiana* and *Viola tricolor* is illustrated (A). The cyclotide loop number (1 to 6) is indicated above the alignment and the number of the conserved cysteine residues is shown by Roman characters below the alignment; X represents one or multiple unknown amino acids within the partial sequence of psysol 1. A sequence logo based on the sequences shown in A is presented in (B). The size of each individual amino acid (shown in one-letter code) is representative for its relative frequency in the sequence alignment. The conserved cysteine residues are indicated in yellow, and proline residues are highlighted in blue and are labelled with an asterisk (B).

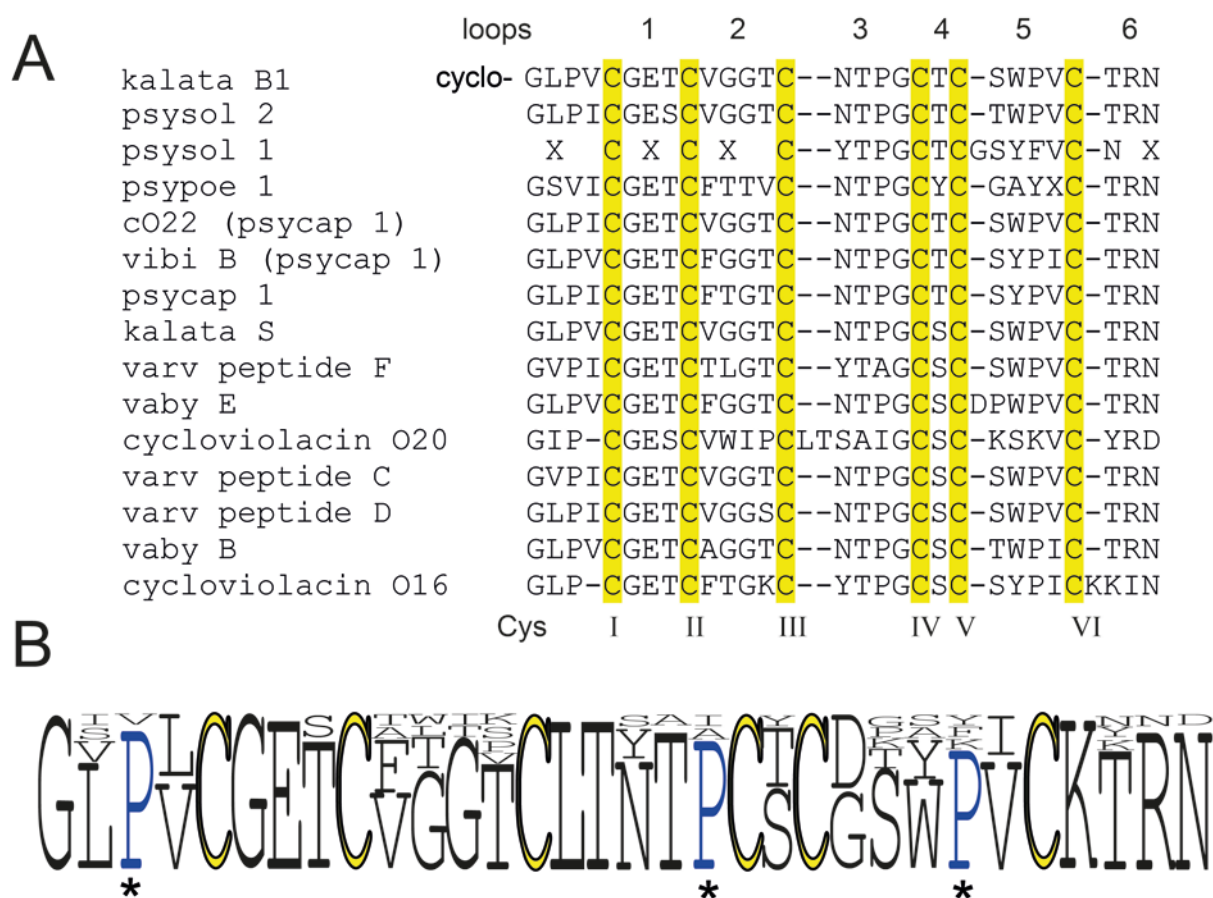

Supplement: np501061t_si_001.pdf [file np501061t_si_001.pdf]
